# Supplementary material
Source: publisher site journal article supplement (https://www.dovepress.com/article/133172)

## Supplementary material

**Part 1:** The chemical characterization data of **A1–A6**, **B1–B10**, **C1–C9** and **D1–D7**, as well as some representative original spectrums (NMR, MS, HPLC), were shown as follows.

### (3*E*,5*E*)-3,5-bis((1*H*-pyrrol-2-yl)methylene)piperidin-4-one (**A1**)

Orange powder, 54.32% yield, mp 265.5-267.5 °C. <sup>1</sup>H NMR (500 MHz, DMSO-*d*<sub>6</sub>) δ: 11.439 (s, 2H, Ar-H<sup>1</sup>×2), 7.520 (s, 2H, Ar-H<sup>5</sup>×2), 7.073 (s, 2H, Ar-CH=C×2), 6.401 (s, 2H, Ar-H<sup>3</sup>×2), 6.269 (s, 2H, Ar-H<sup>4</sup>×2), 3.873 (s, 4H, NH-CH<sub>2</sub>×2), 2.607 (s, 1H, CH<sub>2</sub>-NH-CH<sub>2</sub>). ESI-MS *m/z*: 254.03 (M+H)<sup>+</sup>, calcd for C<sub>15</sub>H<sub>15</sub>N<sub>3</sub>O: 253.12. HPLC purity: 95.18%.

### (3*E*,5*E*)-3,5-bis(furan-2-ylmethylene)piperidin-4-one (**A2**)

Yellowish brown powder, 83.27% yield, mp 136.7-138.6 °C. <sup>1</sup>H NMR (500 MHz, CDCl<sub>3</sub>) δ: 7.943 (d, *J* = 5.0 Hz, 2H, Ar-H<sup>5</sup>×2), 7.792 (s, 2H, Ar-CH=C×2), 7.352 (d, *J* = 3.0 Hz, 2H, Ar-H<sup>3</sup>×2), 6.889 (d, *J* = 3.0 Hz, 2H, Ar-H<sup>4</sup>×2), 4.234 (s, 4H, N-CH<sub>2</sub>×2), 1.833 (s, 1H, -NH). ESI-MS *m/z*: 256.12 (M+H)<sup>+</sup>, calcd for C<sub>15</sub>H<sub>13</sub>NO<sub>3</sub>: 255.09. HPLC purity: 97.25%.

### (3*E*,5*E*)-3,5-bis(thiophen-2-ylmethylene)piperidin-4-one (**A3**)

Yellow powder, 76.39% yield, mp 205.4-208.7 °C. <sup>1</sup>H NMR (500 MHz, DMSO-*d*<sub>6</sub>) δ: 7.907 (d, *J* = 5.0 Hz, 2H, Ar-H<sup>5</sup>×2), 7.785 (s, 2H, Ar-CH=C×2), 7.559 (s, 2H, Ar-H<sup>3</sup>×2), 7.259 (d, *J* = 4.0 Hz, 2H, Ar-H<sup>4</sup>×2), 4.002 (s, 4H, N-CH<sub>2</sub>×2), 1.237 (s, 1H, -NH). ESI-MS *m/z*: 287.76 (M+H)<sup>+</sup>, calcd for C<sub>15</sub>H<sub>13</sub>NOS<sub>2</sub>: 287.04. HPLC purity: 100%.

### (3*E*,5*E*)-3,5-bis((5-methyl-1*H*-pyrrol-2-yl)methylene)piperidin-4-one (**A4**)

Orange yellow powder, 62.55% yield, mp 191.6-193.0 °C. <sup>1</sup>H NMR (500 MHz, CDCl<sub>3</sub>) δ: 7.743 (s, 2H, Ar-CH=C×2), 6.829 (s, 2H, Ar-H<sup>1</sup>×2), 6.424 (d, *J* = 3.5 Hz, 2H, Ar-H<sup>3</sup>×2), 6.261 (s, 2H, Ar-H<sup>4</sup>×2), 4.072 (s, 4H, NH-CH<sub>2</sub>×2), 3.744 (s, 6H, -CH<sub>3</sub>×2), 1.860 (s, 1H, CH<sub>2</sub>-NH-CH<sub>2</sub>). ESI-MS *m/z*: 282.04 (M+H)<sup>+</sup>, calcd for C<sub>17</sub>H<sub>19</sub>N<sub>3</sub>O: 281.15.

HPLC purity: 100%.

**(3E,5E)-3,5-bis((5-methylfuran-2-yl)methylene)piperidin-4-one (A5)**

Orange powder, 87.35% yield, mp 137.8-139.2 °C. <sup>1</sup>H NMR (500 MHz, CDCl<sub>3</sub>) δ: 7.412 (s, 2H, Ar-CH=C×2), 6.551 (d, *J* = 3.0 Hz, 2H, Ar-H<sup>3</sup>×2), 6.115 (d, *J* = 3.0 Hz, 2H, Ar-H<sup>4</sup>×2), 4.229 (s, 4H, N-CH<sub>2</sub>×2), 2.356 (s, 6H, -CH<sub>3</sub>×2), 1.849 (s, 1H, -NH). ESI-MS *m/z*: 284.11 (M+H)<sup>+</sup>, calcd for C<sub>17</sub>H<sub>17</sub>NO<sub>3</sub>: 283.12. HPLC purity: 100%.

**(3E,5E)-3,5-bis((5-methylthiophen-2-yl)methylene)piperidin-4-one (A6)**

Orange yellow powder, 77.14% yield, mp 197.3-198.7 °C. <sup>1</sup>H NMR (500 MHz, CDCl<sub>3</sub>) δ: 7.835 (s, 2H, Ar-CH=C×2), 7.136 (d, *J* = 3.0 Hz, 2H, Ar-H<sup>3</sup>×2), 6.804 (d, *J* = 2.5 Hz, 2H, Ar-H<sup>4</sup>×2), 4.121 (s, 4H, N-CH<sub>2</sub>×2), 2.542 (s, 6H, -CH<sub>3</sub>×2), 1.745 (s, 1H, -NH). ESI-MS *m/z*: 315.85 (M+H)<sup>+</sup>, calcd for C<sub>17</sub>H<sub>17</sub>NOS<sub>2</sub>: 315.08. HPLC purity: 97.56%.

**(3E,5E)-3,5-bis(3-fluorobenzylidene)piperidin-4-one (B1)**

Light yellow powder, 84.7% yield, mp 139.0-140.5 °C. <sup>1</sup>H-NMR (500MHz, CDCl<sub>3</sub>), δ: 7.987 (s, 2H, Ar-CH=C×2), 7.678 (d, *J* = 8.0 Hz, 2H, Ar-H<sup>6</sup>×2), 7.390 (t, *J* = 8.0 Hz, 2H, Ar-H<sup>5</sup>×2), 7.296 (d, *J* = 8.0 Hz, 2H, Ar-H<sup>4</sup>×2), 7.245 (d, *J* = 7.5 Hz, 2H, Ar-H<sup>2</sup>×2), 3.977 (s, 4H, N-CH<sub>2</sub>×2), 1.745 (s, 1H, -NH). ESI-MS *m/z*: 312.21 (M+H)<sup>+</sup>, calcd for C<sub>19</sub>H<sub>15</sub>F<sub>2</sub>NO: 311.11. HPLC purity: 98.86%.

**(3E,5E)-3,5-bis(4-fluorobenzylidene)piperidin-4-one (B2)**

Light yellow powder, 89.3% yield, mp 169.0-170.5 °C. <sup>1</sup>H-NMR (500MHz, CDCl<sub>3</sub>), δ: 7.785 (s, 2H, Ar-CH=C×2), 7.396 (d, *J* = 8.0 Hz, 4H, Ar-H<sup>2</sup>×2, Ar-H<sup>6</sup>×2), 7.125 (d, *J* = 8.5 Hz, 4H, Ar-H<sup>3</sup>×2, Ar-H<sup>5</sup>×2), 3.972 (s, 4H, N-CH<sub>2</sub>×2), 1.766 (s, 1H, -NH). ESI-MS *m/z*: 312.20 (M+H)<sup>+</sup>, calcd for C<sub>19</sub>H<sub>15</sub>F<sub>2</sub>NO: 311.11. HPLC purity: 100%.

**(3E,5E)-3,5-bis(2-chlorobenzylidene)piperidin-4-one (B3)**

Light yellow powder, 68.66% yield, mp 112.3-113.4 °C. <sup>1</sup>H NMR (500 MHz, CDCl<sub>3</sub>) δ: 7.965 (s, 2H, Ar-CH=C×2), 7.459 (t, *J* = 3.0 Hz, 2H, Ar-H<sup>3</sup>×2), 7.285 (d, *J* = 5.5 Hz,

2H, Ar-H<sup>5</sup>×2), 7.214 (t,  $J = 3.0$  Hz, 2H, Ar-H<sup>6</sup>×2), 7.194 (d,  $J = 4.0$  Hz, 2H, Ar-H<sup>4</sup>×2), 3.999 (d,  $J = 2.0$  Hz, 4H, N-CH<sub>2</sub>×2), 2.048 (s, 1H, -NH). ESI-MS  $m/z$ : 344.08 (M+H)<sup>+</sup>, calcd for C<sub>19</sub>H<sub>15</sub>Cl<sub>2</sub>NO: 343.05. HPLC purity: 100%.

**(3E,5E)-3,5-bis(2-bromobenzylidene)piperidin-4-one (B4)**

Yellow powder, 76.34% yield, mp 147.4-149.6 °C. <sup>1</sup>H NMR (500 MHz, CDCl<sub>3</sub>)  $\delta$ : 7.906 (s, 2H, Ar-CH=C×2), 7.649 (dd,  $J_1 = 1.5$  Hz,  $J_2 = 10.0$  Hz, 2H, Ar-H<sup>3</sup>×2), 7.340 (dt,  $J_1 = 1.5$  Hz,  $J_2 = 9.0$  Hz, 2H, Ar-H<sup>5</sup>×2), 7.228 (dd,  $J_1 = 2.0$  Hz,  $J_2 = 10.0$  Hz, 2H, Ar-H<sup>6</sup>×2), 7.206 (dd,  $J_1 = 3.0$  Hz,  $J_2 = 9.5$  Hz, 2H, Ar-H<sup>4</sup>×2), 3.982 (d,  $J = 2.5$  Hz, 4H, N-CH<sub>2</sub>×2), 1.734 (s, 1H, -NH). ESI-MS  $m/z$ : 431.99 (M+H)<sup>+</sup>, calcd for C<sub>19</sub>H<sub>15</sub>Br<sub>2</sub>NO: 430.95. HPLC purity: 100%.

**(3E,5E)-3,5-bis(2-methoxybenzylidene)piperidin-4-one (B5)**

Yellow powder, 83.58% yield, mp 157.2-159.6 °C. <sup>1</sup>H NMR (500 MHz, CDCl<sub>3</sub>)  $\delta$ : 8.006 (s, 2H, Ar-CH=C×2), 7.336 (t,  $J = 7.5$  Hz, 2H, Ar-H<sup>4</sup>×2), 7.162 (d,  $J = 7.5$  Hz, 2H, Ar-H<sup>6</sup>×2), 6.964 (t,  $J = 7.5$  Hz, 2H, Ar-H<sup>5</sup>×2), 6.915 (d,  $J = 8.5$  Hz, 2H, Ar-H<sup>3</sup>×2), 4.028 (s, 4H, N-CH<sub>2</sub>×2), 3.856 (s, 6H, -OCH<sub>3</sub>×2), 1.734 (s, 1H, -NH). ESI-MS  $m/z$ : 335.75 (M+H)<sup>+</sup>, calcd for C<sub>21</sub>H<sub>21</sub>NO<sub>3</sub>: 335.15. HPLC purity: 100%.

**(3E,5E)-3,5-bis(4-chlorobenzylidene)piperidin-4-one (B6)**

Light yellow powder, 72.88% yield, mp 191.3-193.7 °C. <sup>1</sup>H NMR (500 MHz, CDCl<sub>3</sub>)  $\delta$ : 7.734 (s, 2H, Ar-CH=C×2), 7.390 (d,  $J = 10.5$  Hz, 4H, Ar-H<sup>2</sup>×2, Ar-H<sup>6</sup>×2), 7.308 (d,  $J = 10.5$  Hz, 4H, Ar-H<sup>3</sup>×2, Ar-H<sup>5</sup>×2), 4.115 (d,  $J = 2.5$  Hz, 4H, N-CH<sub>2</sub>×2), 3.856 (s, 6H, -OCH<sub>3</sub>×2), 1.685 (s, 1H, -NH). ESI-MS  $m/z$ : 344.08 (M+H)<sup>+</sup>, calcd for C<sub>19</sub>H<sub>15</sub>Cl<sub>2</sub>NO: 343.05. HPLC purity: 95.43%.

**(3E,5E)-3,5-bis(3-bromobenzylidene)piperidin-4-one (B7)**

White powder, 69.60% yield, mp 120.6-124.6 °C. <sup>1</sup>H NMR (500 MHz, CDCl<sub>3</sub>)  $\delta$ : 8.020 (s, 2H, Ar-CH=C×2), 7.516 (s, 2H, Ar-H<sup>2</sup>×2), 7.420 (d,  $J = 7.5$  Hz, 2H, Ar-H<sup>6</sup>×2), 7.360 (d,  $J = 7.5$  Hz, 2H, Ar-H<sup>4</sup>×2), 7.192 (t,  $J = 8.5$  Hz, 2H, Ar-H<sup>5</sup>×2), 4.120 (s, 4H, N-

CH<sub>2</sub>×2), 1.622 (s, 1H, -NH). ESI-MS m/z: 431.99 (M+H)<sup>+</sup>, calcd for C<sub>19</sub>H<sub>15</sub>Br<sub>2</sub>NO: 430.95. HPLC purity: 96.25%.

**(3E,5E)-3,5-bis(4-bromobenzylidene)piperidin-4-one (B8)**

Light yellow powder, 58.05% yield, mp 206.7-208.7 °C. <sup>1</sup>H NMR (500 MHz, CDCl<sub>3</sub>) δ: 7.711 (s, 2H, Ar-CH=C×2), 7.548 (d, *J* = 8.0 Hz, 4H, Ar-H<sup>2</sup>×2, Ar-H<sup>6</sup>×2), 7.240 (d, *J* = 8.5 Hz, 4H, Ar-H<sup>3</sup>×2, Ar-H<sup>5</sup>×2), 4.105 (s, 4H, N-CH<sub>2</sub>×2), 1.676 (s, 1H, -NH). ESI-MS m/z: 431.99 (M+H)<sup>+</sup>, calcd for C<sub>19</sub>H<sub>15</sub>Br<sub>2</sub>NO: 430.95. HPLC purity: 100%.

**(3E,5E)-3,5-bis(3-methoxybenzylidene)piperidin-4-one (B9)**

Light yellow powder, 54.25% yield, mp 164.5-167.2 °C. <sup>1</sup>H NMR (500 MHz, CDCl<sub>3</sub>) δ: 7.781 (s, 2H, Ar-CH=C×2), 7.636 (t, *J* = 8.5 Hz, 2H, Ar-H<sup>5</sup>×2), 7.122 (d, *J* = 8.0 Hz, 2H, Ar-H<sup>6</sup>×2), 7.062 (s, 2H, Ar-H<sup>2</sup>×2), 6.915 (d, *J* = 8.5 Hz, 2H, Ar-H<sup>3</sup>×2), 4.018 (s, 4H, N-CH<sub>2</sub>×2), 3.841 (s, 6H, -OCH<sub>3</sub>×2), 1.619 (s, 1H, -NH). ESI-MS m/z: 335.75 (M+H)<sup>+</sup>, calcd for C<sub>21</sub>H<sub>21</sub>NO<sub>3</sub>: 335.15. HPLC purity: 97.03%.

**(3E,5E)-3,5-bis(4-methoxybenzylidene)piperidin-4-one (B10)**

Light yellow powder, 77.22% yield, mp >300 °C. <sup>1</sup>H NMR (500 MHz, CDCl<sub>3</sub>) δ: 7.792 (s, 2H, Ar-CH=C×2), 7.373 (d, *J* = 8.0 Hz, 4H, Ar-H<sup>2</sup>×2, Ar-H<sup>6</sup>×2), 6.951 (d, *J* = 8.5 Hz, 4H, Ar-H<sup>3</sup>×2, Ar-H<sup>5</sup>×2), 4.128 (s, 4H, N-CH<sub>2</sub>×2), 3.852 (s, 6H, -OCH<sub>3</sub>×2), 1.704 (s, 1H, -NH). ESI-MS m/z: 335.75 (M+H)<sup>+</sup>, calcd for C<sub>21</sub>H<sub>21</sub>NO<sub>3</sub>: 335.15. HPLC purity: 100%.

**(3E,5E)-3,5-bis(2,5-difluorobenzylidene)piperidin-4-one (C1)**

Light yellow powder, 37.35% yield, mp 195.2-197.2 °C. <sup>1</sup>H NMR (500 MHz, CDCl<sub>3</sub>) δ: 7.911 (s, 2H, Ar-CH=C×2), 7.180 (d, *J* = 8.5 Hz, 2H, Ar-H<sup>3</sup>×2), 7.036 (d, *J* = 8.5 Hz, 2H, Ar-H<sup>4</sup>×2), 7.064 (s, 2H, Ar-H<sup>6</sup>×2), 3.991 (s, 4H, N-CH<sub>2</sub>×2), 1.681 (s, 1H, -NH). ESI-MS m/z: 347.75 (M+H)<sup>+</sup>, calcd for C<sub>19</sub>H<sub>13</sub>F<sub>4</sub>NO: 347.09. HPLC purity: 100%.

**(3E,5E)-3,5-bis(2-fluoro-4-methoxybenzylidene)piperidin-4-one (C2)**

Light yellow powder, 53.32% yield, mp 145.8-147.2 °C. <sup>1</sup>H NMR (500 MHz, CDCl<sub>3</sub>) δ: 7.836 (s, 2H, Ar-CH=C×2), 7.203 (t, *J* = 10.5 Hz, 2H, Ar-H<sup>6</sup>×2), 6.728 (d, *J*<sub>1</sub> = 3.0 Hz, *J*<sub>2</sub> = 10.5 Hz, 2H, Ar-H<sup>3</sup>×2), 6.964 (t, *J*<sub>1</sub> = 3.0 Hz, *J*<sub>2</sub> = 10.0 Hz, 2H, Ar-H<sup>5</sup>×2), 4.031 (s, 4H, N-CH<sub>2</sub>×2), 3.839 (s, 6H, -OCH<sub>3</sub>×2), 1.753 (s, 1H, -NH). ESI-MS *m/z*: 371.78 (M+H)<sup>+</sup>, calcd for C<sub>21</sub>H<sub>19</sub>F<sub>2</sub>NO<sub>3</sub>: 371.13. HPLC purity: 100%.

**(3*E*,5*E*)-3,5-bis(2-fluoro-6-methoxybenzylidene)piperidin-4-one (C3)**

Light yellow powder, 73.22% yield, mp 165.5-167.5 °C. <sup>1</sup>H NMR (500 MHz, CDCl<sub>3</sub>) δ: 7.792 (s, 2H, Ar-CH=C×2), 6.927 (d, *J* = 7.5 Hz, 2H, Ar-H<sup>4</sup>×2), 6.706 (d, *J* = 7.5 Hz, 2H, Ar-H<sup>3</sup>×2), 6.622 (d, *J* = 7.0 Hz, 2H, Ar-H<sup>5</sup>×2), 4.019 (s, 4H, N-CH<sub>2</sub>×2), 3.754 (s, 6H, -OCH<sub>3</sub>×2), 1.627 (s, 1H, -NH). ESI-MS *m/z*: 371.78 (M+H)<sup>+</sup>, calcd for C<sub>21</sub>H<sub>19</sub>F<sub>2</sub>NO<sub>3</sub>: 371.13. HPLC purity: 100%.

**(3*E*,5*E*)-3,5-bis(2-bromo-5-methoxybenzylidene)piperidin-4-one (C4)**

Yellow powder, 71.33% yield, mp 174.0-176.5 °C. <sup>1</sup>H NMR (500 MHz, CDCl<sub>3</sub>) δ: 7.850 (s, 2H, Ar-CH=C×2), 7.522 (d, *J* = 11.0 Hz, 2H, Ar-H<sup>3</sup>×2), 6.782 (d, *J* = 11.0 Hz, 2H, Ar-H<sup>4</sup>×2), 6.730 (d, *J* = 3.0 Hz, 2H, Ar-H<sup>6</sup>×2), 3.998 (s, 4H, N-CH<sub>2</sub>×2), 3.806 (s, 6H, -OCH<sub>3</sub>×2), 1.703 (s, 1H, -NH). ESI-MS *m/z*: 492.03 (M+H)<sup>+</sup>, calcd for C<sub>21</sub>H<sub>19</sub>Br<sub>2</sub>NO<sub>3</sub>: 490.97. HPLC purity: 97.61%.

**(3*E*,5*E*)-3,5-bis(2-bromo-6-fluorobenzylidene)piperidin-4-one (C5)**

Light yellow powder, 69.35% yield, mp 172.2-173.3 °C. <sup>1</sup>H NMR (500 MHz, CDCl<sub>3</sub>) δ: 7.558 (s, 2H, Ar-CH=C×2), 7.451 (d, *J* = 8.0 Hz, 2H, Ar-H<sup>3</sup>×2), 7.162 (q, *J* = 8.0 Hz, 2H, Ar-H<sup>4</sup>×2), 7.098 (t, *J* = 8.5 Hz, 2H, Ar-H<sup>5</sup>×2), 3.744 (s, 4H, N-CH<sub>2</sub>×2), 1.721 (s, 1H, -NH). ESI-MS *m/z*: 468.00 (M+H)<sup>+</sup>, calcd for C<sub>19</sub>H<sub>13</sub>Br<sub>2</sub>F<sub>2</sub>NO: 466.93. HPLC purity: 97.35%.

**(3*E*,5*E*)-3,5-bis(2-bromo-5-fluorobenzylidene)piperidin-4-one (C6)**

White powder, 79.25% yield, mp 135.8-137.6 °C. <sup>1</sup>H NMR (500 MHz, CDCl<sub>3</sub>) δ: 7.816 (s, 2H, Ar-CH=C×2), 7.481 (d, *J* = 7.5 Hz, 2H, Ar-H<sup>3</sup>×2), 7.014 (d, *J* = 7.5 Hz, 2H, Ar-H<sup>4</sup>×2), 6.864 (s, 2H, Ar-H<sup>6</sup>×2), 3.971 (s, 4H, N-CH<sub>2</sub>×2), 1.622 (s, 1H, -NH). ESI-MS

m/z: 468.00 (M+H)<sup>+</sup>, calcd for C<sub>19</sub>H<sub>13</sub>Br<sub>2</sub>F<sub>2</sub>NO: 466.93. HPLC purity: 100%.

**(3E,5E)-3,5-bis(2-bromo-5-chlorobenzylidene)piperidin-4-one (C7)**

White powder, 43.82% yield, mp 129.2-130.0 °C. <sup>1</sup>H NMR (500 MHz, CDCl<sub>3</sub>) δ: 7.879 (s, 2H, Ar-CH=C×2), 7.460 (d, *J* = 8.5 Hz, 2H, Ar-H<sup>3</sup>×2), 7.133 (d, *J* = 7.5 Hz, 2H, Ar-H<sup>4</sup>×2), 7.055 (s, 2H, Ar-H<sup>6</sup>×2), 3.970 (s, 4H, N-CH<sub>2</sub>×2), 1.657 (s, 1H, -NH). ESI-MS m/z: 499.91 (M+H)<sup>+</sup>, calcd for C<sub>19</sub>H<sub>13</sub>Br<sub>2</sub>Cl<sub>2</sub>NO: 498.87. HPLC purity: 100%.

**(3E,5E)-3,5-bis(2,5-dibromobenzylidene)piperidin-4-one (C8)**

Yellow powder, 51.69% yield, mp 219.8-221.4 °C. <sup>1</sup>H NMR (500 MHz, CDCl<sub>3</sub>) δ: 7.787 (s, 2H, Ar-CH=C×2), 7.509 (t, *J* = 8.0 Hz, 2H, Ar-H<sup>6</sup>×2), 7.343 (d, *J* = 8.0 Hz, 2H, Ar-H<sup>3</sup>×2), 7.325 (s, 2H, Ar-H<sup>4</sup>×2), 3.977 (s, 4H, N-CH<sub>2</sub>×2), 1.723 (s, 1H, -NH). ESI-MS m/z: 587.82 (M+H)<sup>+</sup>, calcd for C<sub>19</sub>H<sub>13</sub>Br<sub>4</sub>NO: 586.77. HPLC purity: 99.17%.

**(3E,5E)-3,5-bis(2,6-dichlorobenzylidene)piperidin-4-one (C9)**

Light yellow powder, 84.74% yield, mp 183.8-184.6 °C. <sup>1</sup>H NMR (500 MHz, CDCl<sub>3</sub>) δ: 7.640 (s, 2H, Ar-CH=C×2), 7.357 (d, *J* = 8.0 Hz, 4H, Ar-H<sup>3</sup>×2, Ar-H<sup>5</sup>×2), 7.228 (t, *J* = 8.0 Hz, 2H, Ar-H<sup>4</sup>×2), 3.674 (s, 4H, N-CH<sub>2</sub>×2), 1.610 (s, 1H, -NH). ESI-MS m/z: 412.00 (M+H)<sup>+</sup>, calcd for C<sub>19</sub>H<sub>13</sub>Cl<sub>4</sub>NO: 410.98. HPLC purity: 97.52%.

**(3E,5E)-3,5-bis((5-bromo-1H-indol-3-yl)methylene)piperidin-4-one (D1)**

White powder, 39.13% yield, mp 201.0-203.0 °C. <sup>1</sup>H NMR (500 MHz, DMSO-d<sub>6</sub>) δ: 10.032 (s, 2H, Ar-NH<sup>3</sup>×2), 8.361 (s, 2H, Ar-H<sup>2</sup>×2), 8.223 (s, 2H, Ar-CH=C×2), 7.501 (d, *J* = 10.5 Hz, 2H, Ar-H<sup>5</sup>×2), 7.415 (d, *J* = 2.5 Hz, 2H, Ar-H<sup>4</sup>×2), 7.393 (d, *J* = 2.5 Hz, 2H, Ar-H<sup>7</sup>×2), 4.052 (s, 4H, N-CH<sub>2</sub>×2), 1.708 (s, 1H, -NH). ESI-MS m/z: 510.01 (M+H)<sup>+</sup>, calcd for C<sub>23</sub>H<sub>17</sub>Br<sub>2</sub>N<sub>3</sub>O: 508.97. HPLC purity: 96.18%.

**(3E,5E)-3,5-bis((E)-3-(2-methoxyphenyl)allylidene)piperidin-4-one (D2)**

Orange powder, 72.35% yield, mp 134.9-136.8 °C. <sup>1</sup>H NMR (500 MHz, CDCl<sub>3</sub>) δ: 7.530 (dd, *J*<sub>1</sub> = 2.0 Hz, *J*<sub>2</sub> = 10.0 Hz, 2H, Ar-H<sup>6</sup>×2), 7.472 (d, *J* = 15.0 Hz, 2H, Ar-CH=CH-CH×2), 7.343 (d, *J* = 19.0 Hz, 2H, Ar-CH=CH-CH×2), 7.287 (dt, *J*<sub>1</sub> = 2.0 Hz,

$J_2 = 11.0$  Hz, 2H, Ar-H<sup>4</sup>×2), 7.343 (dd,  $J_1 = 15.0$  Hz,  $J_2 = 19.0$  Hz, 2H, Ar-CH=CH-CH×2), 6.956 (t,  $J = 9.0$  Hz, 2H, Ar-H<sup>5</sup>×2), 6.896 (d,  $J = 10.0$  Hz, 2H, Ar-H<sup>3</sup>×2), 4.035 (d,  $J = 1.0$  Hz, 4H, N-CH<sub>2</sub>×2), 3.883 (s, 6H, -OCH<sub>3</sub>×2), 1.824 (s, 1H, -NH). ESI-MS  $m/z$ : 388.28 (M+H)<sup>+</sup>, calcd for C<sub>25</sub>H<sub>25</sub>NO<sub>3</sub>: 387.18. HPLC purity: 100%.

**(3E,5E)-3,5-bis((E)-3-(4-bromophenyl)allylidene)piperidin-4-one (D3)**

Yellow powder, 67.35% yield, mp 211.3-213.7 °C. <sup>1</sup>H NMR (500 MHz, CDCl<sub>3</sub>) δ: 7.471 (dd,  $J_1 = 4.5$  Hz,  $J_2 = 10.5$  Hz, 4H, Ar-H<sup>2</sup>×2, Ar-H<sup>6</sup>×2), 7.425 (d,  $J = 15.0$  Hz, 2H, Ar-CH=CH-CH×2), 7.340 (dd,  $J_1 = 1.5$  Hz,  $J_2 = 9.0$  Hz, 4H, Ar-H<sup>3</sup>×2, Ar-H<sup>5</sup>×2), 6.920 (d,  $J = 19.0$  Hz, 2H, Ar-CH=CH-CH×2), 6.853 (dd,  $J_1 = 15.0$  Hz,  $J_2 = 19.0$  Hz, 2H, Ar-CH=CH-CH×2), 4.110 (d,  $J = 2.5$  Hz, 4H, N-CH<sub>2</sub>×2), 1.633 (s, 1H, -NH). ESI-MS  $m/z$ : 484.08 (M+H)<sup>+</sup>, calcd for C<sub>23</sub>H<sub>19</sub>Br<sub>2</sub>NO: 482.98. HPLC purity: 100%.

**(3E,5E)-3,5-bis(naphthalen-2-ylmethylene)piperidin-4-one (D4)**

Yellow powder, 39.17% yield, mp 206.2-208.3 °C. <sup>1</sup>H NMR (500 MHz, DMSO-d<sub>6</sub>) δ: 8.101 (s, 2H, H<sup>2</sup>×2), 7.959-8.101 (m, 4H, H<sup>3</sup>×2, H<sup>6</sup>×2), 7.941 (t,  $J = 9.0$  Hz, 2H, H<sup>7</sup>×2), 7.769 (s, 2H, Ar-CH=C×2), 7.660 (d,  $J = 8.5$  Hz, 2H, H<sup>8</sup>×2), 7.562-7.585 (m, 4H, H<sup>4</sup>×2, H<sup>5</sup>×2), 4.027 (s, 4H, N-CH<sub>2</sub>×2), 1.740 (s, 1H, -NH). ESI-MS  $m/z$ : 375.92 (M+H)<sup>+</sup>, calcd for C<sub>27</sub>H<sub>21</sub>NO: 375.16. HPLC purity: 95.99%.

**(3E,5E)-3,5-bis(4-(diphenylamino)benzylidene)piperidin-4-one (D5)**

Orange yellow powder, 41.05% yield, mp 126.5-128.4 °C. <sup>1</sup>H NMR (500 MHz, CDCl<sub>3</sub>) δ: 7.678 (d,  $J = 8.5$  Hz, 4H, Ar-H<sup>2</sup>×2, Ar-H<sup>6</sup>×2), 7.356 (s, 2H, Ar-CH=C×2), 7.341 (t,  $J = 8.0$  Hz, 8H, Ar'-H<sup>3</sup>×4, Ar'-H<sup>5</sup>×4), 7.175 (d,  $J = 6.5$  Hz, 8H, Ar'-H<sup>2</sup>×4, Ar'-H<sup>6</sup>×4), 7.168 (d,  $J = 7.5$  Hz, 2H, Ar'-H<sup>4</sup>×2), 6.964 (t,  $J = 8.5$  Hz, 4H, Ar-H<sup>3</sup>×2, Ar-H<sup>5</sup>×2), 3.722 (d,  $J = 7.0$  Hz, 4H, N-CH<sub>2</sub>×2), 1.681 (s, 1H, -NH). ESI-MS  $m/z$ : 610.42 (M+H)<sup>+</sup>, calcd for C<sub>43</sub>H<sub>35</sub>N<sub>3</sub>O: 609.28. HPLC purity: 100%.

**(3E,5E)-3,5-bis(4-(2-(dimethylamino)ethoxy)benzylidene)piperidin-4-one (D6)**

Orange yellow powder, 44.48% yield, mp 111.8-113.2 °C. <sup>1</sup>H NMR (500 MHz, CDCl<sub>3</sub>) δ: 7.758 (s, 2H, Ar-CH=C×2), 7.346 (d,  $J = 8.0$  Hz, 4H, Ar-H<sup>2</sup>×2, Ar-H<sup>6</sup>×2), 6.937 (d,

$J = 8.0$  Hz, 4H, Ar-H<sup>3</sup>×2, Ar-H<sup>5</sup>×2), 4.146 (s, 4H, N-CH<sub>2</sub>×2), 4.059 (t,  $J = 6.0$  Hz, 4H, -OCH<sub>2</sub>CH<sub>2</sub>N-×2), 2.463 (t,  $J = 7.0$  Hz, 4H, -OCH<sub>2</sub>CH<sub>2</sub>N-×2), 2.623 (s, 12H, -NCH<sub>3</sub>×4), 1.975 (t,  $J = 6.5$  Hz, 1H, -NH). ESI-MS  $m/z$ : 450.41 (M+H)<sup>+</sup>, calcd for C<sub>27</sub>H<sub>35</sub>N<sub>3</sub>O<sub>3</sub>: 449.27. HPLC purity: 99.36%.

**(3E,5E)-3,5-bis(4-(dibutylamino)benzylidene)piperidin-4-one (D7)**

Purple powder, 37.80% yield, mp 148.8-151.5 °C. <sup>1</sup>H NMR (500 MHz, DMSO-d<sub>6</sub>)  $\delta$ : 7.463 (s, 2H, Ar-CH=C×2), 7.302 (d,  $J = 11.0$  Hz, 4H, Ar-H<sup>2</sup>×2, Ar-H<sup>6</sup>×2), 6.689 (d,  $J = 11.0$  Hz, 2H, Ar-H<sup>3</sup>×2, Ar-H<sup>5</sup>×2), 3.972 (s, 4H, NH-CH<sub>2</sub>×2), 3.320 (t,  $J = 9.5$  Hz, 8H, -NCH<sub>2</sub>CH<sub>2</sub>CH<sub>2</sub>×4), 1.536 (s, 1H, -NH), 1.516 (t,  $J = 8.0$  Hz, 8H, -NCH<sub>2</sub>CH<sub>2</sub>CH<sub>2</sub>×4), 1.330 (q,  $J = 9.5$  Hz, 8H, -NCH<sub>2</sub>CH<sub>2</sub>CH<sub>2</sub>×4), 0.924 (t,  $J = 8.5$  Hz, 12H, -CH<sub>3</sub>×4). ESI-MS  $m/z$ : 530.56 (M+H)<sup>+</sup>, calcd for C<sub>35</sub>H<sub>51</sub>N<sub>3</sub>O: 529.40. HPLC purity: 100%.



# The original spectrums (NMR, MS, HPLC) of A1

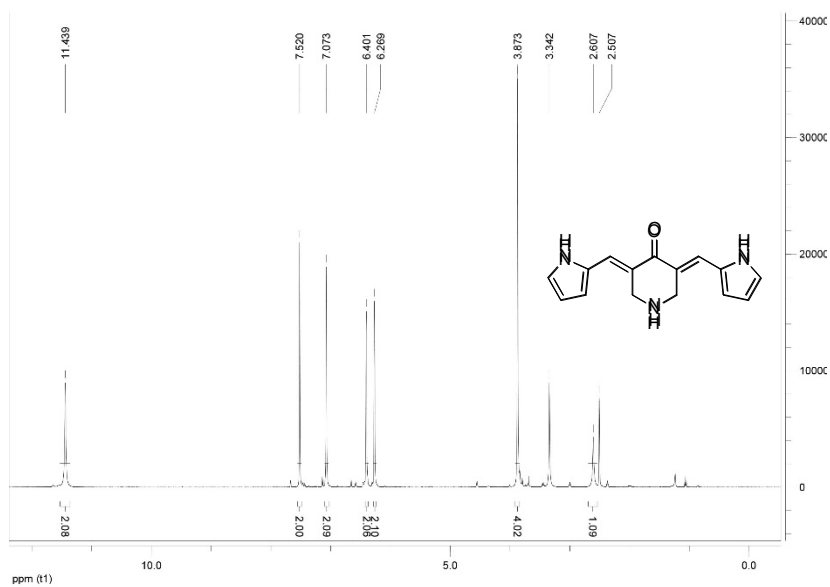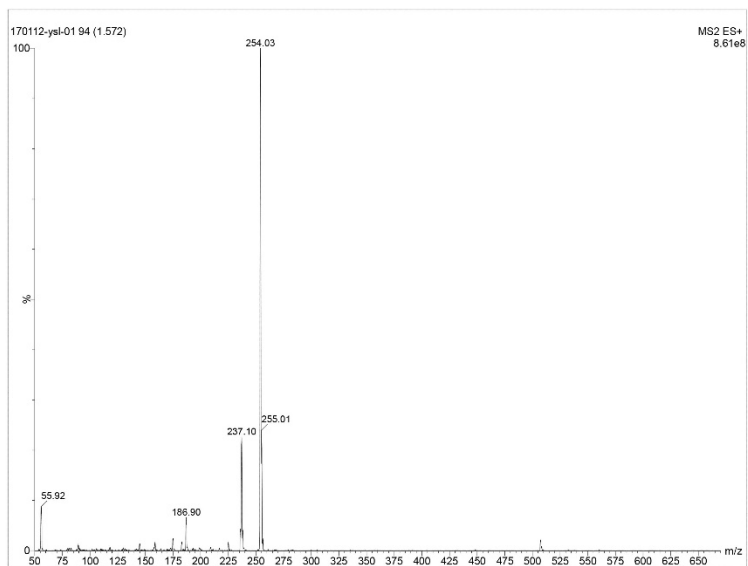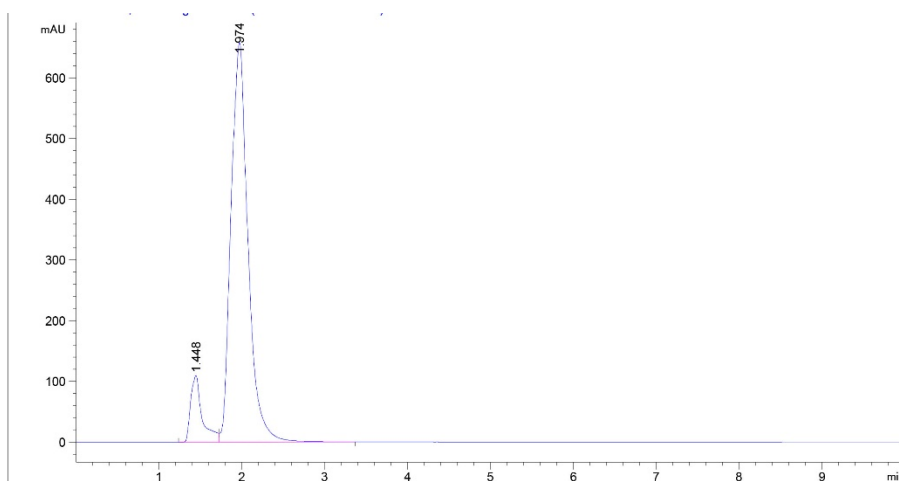

# The original spectrums (NMR, MS, HPLC) of A3

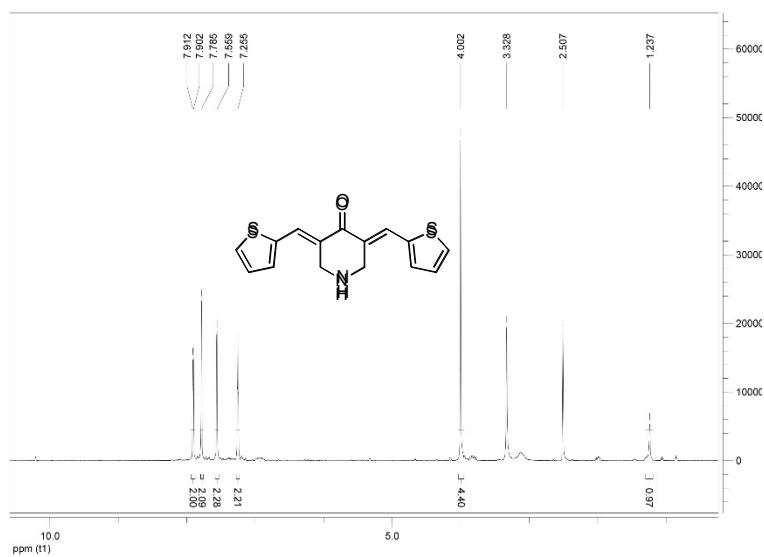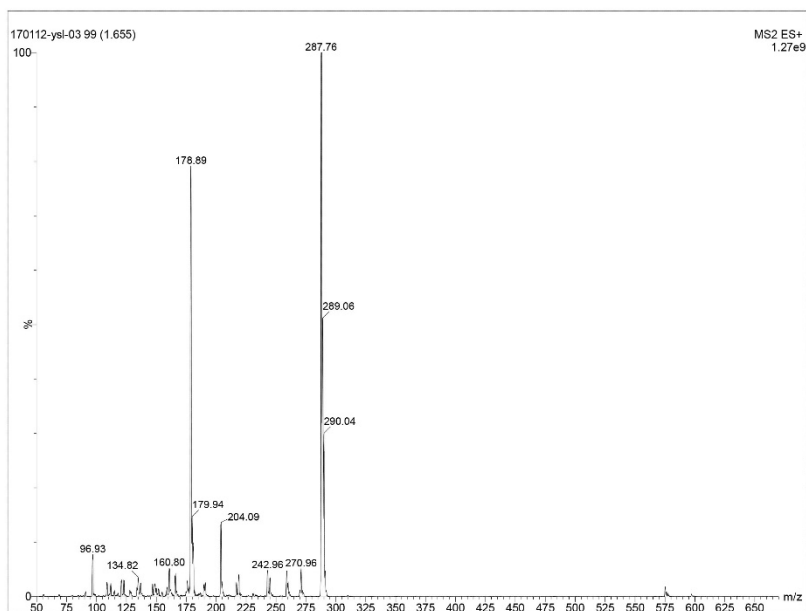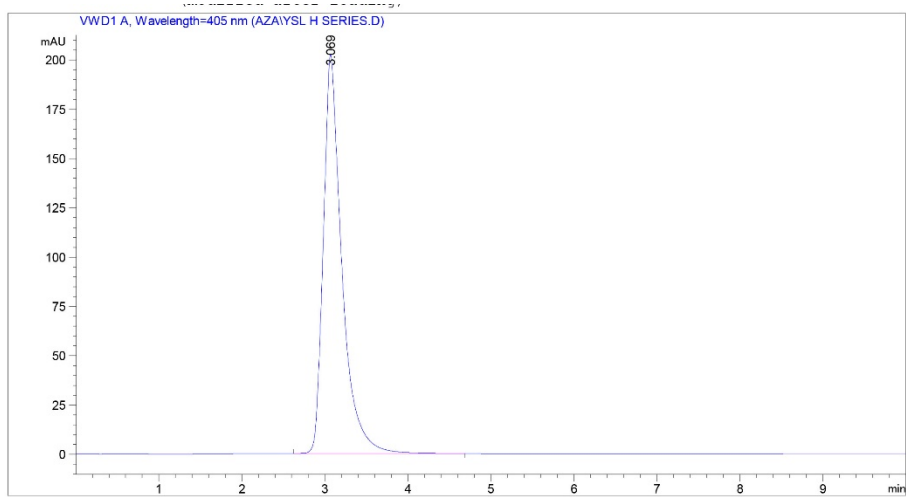

# The original spectrums (NMR, MS, HPLC) of A5

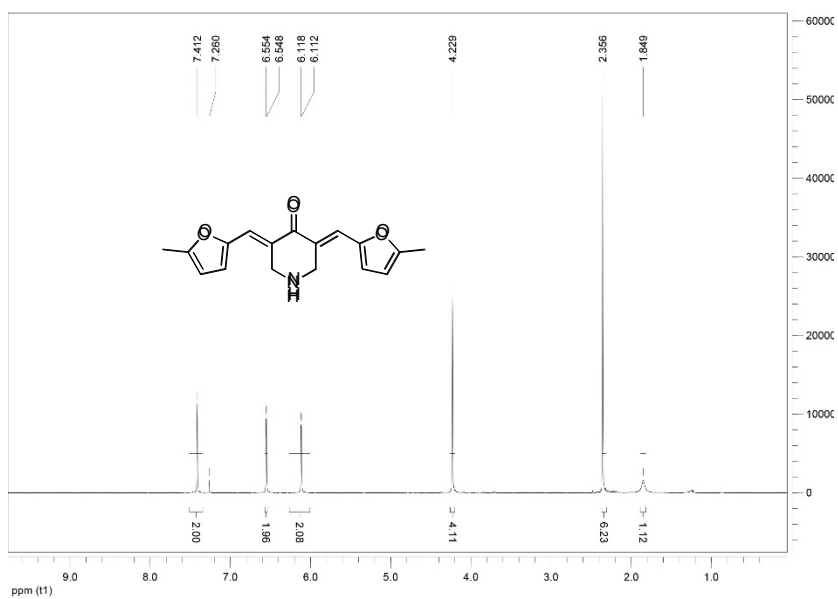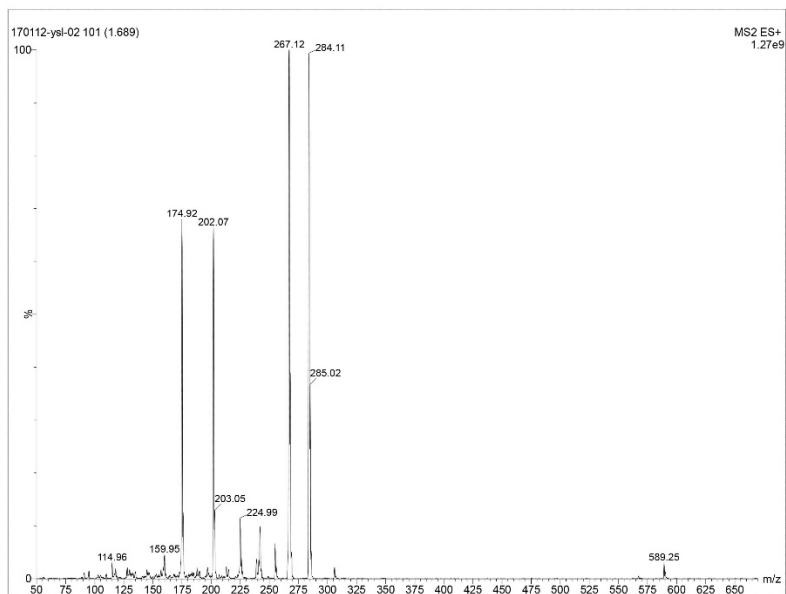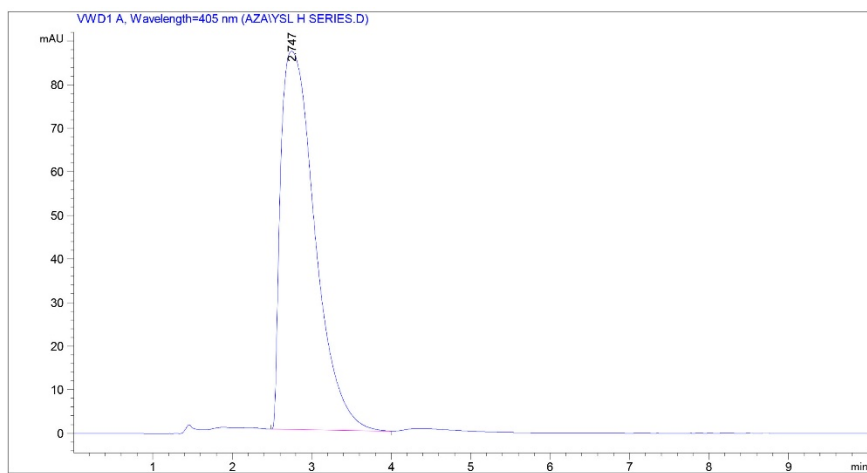

# The original spectrums (NMR, MS, HPLC) of **B3**

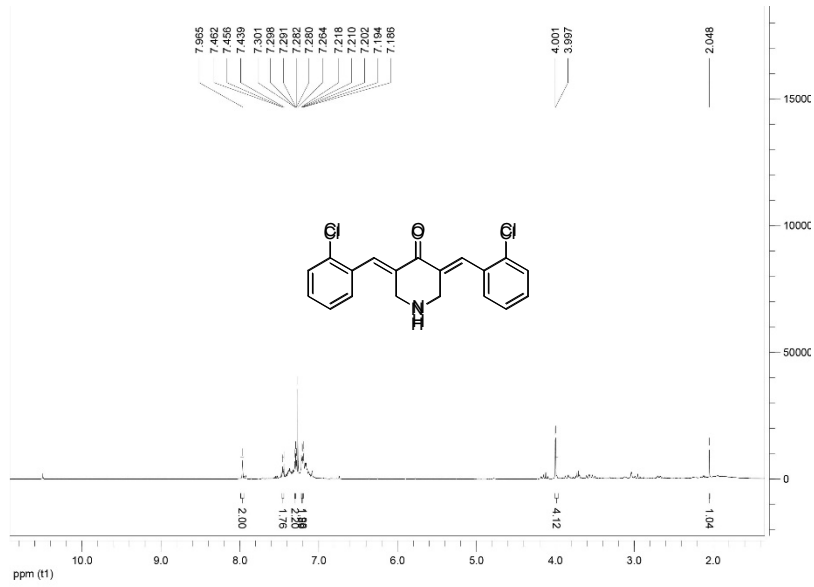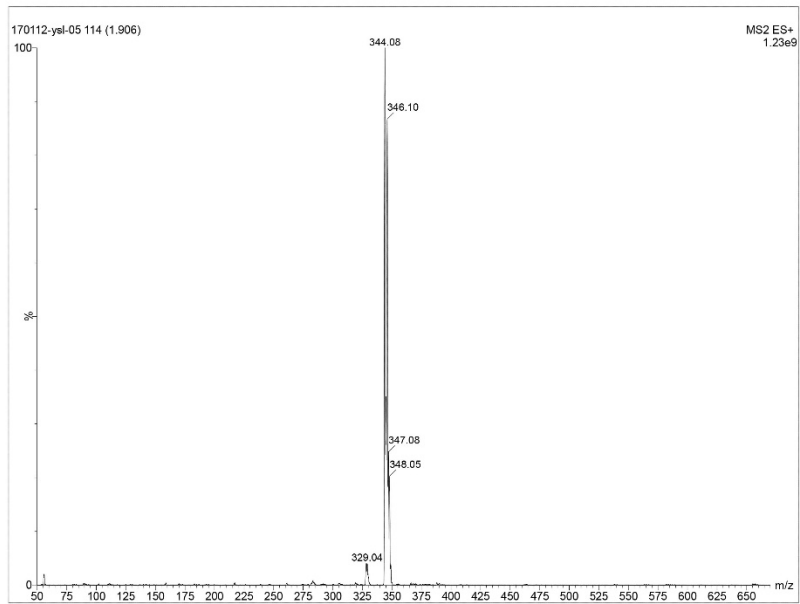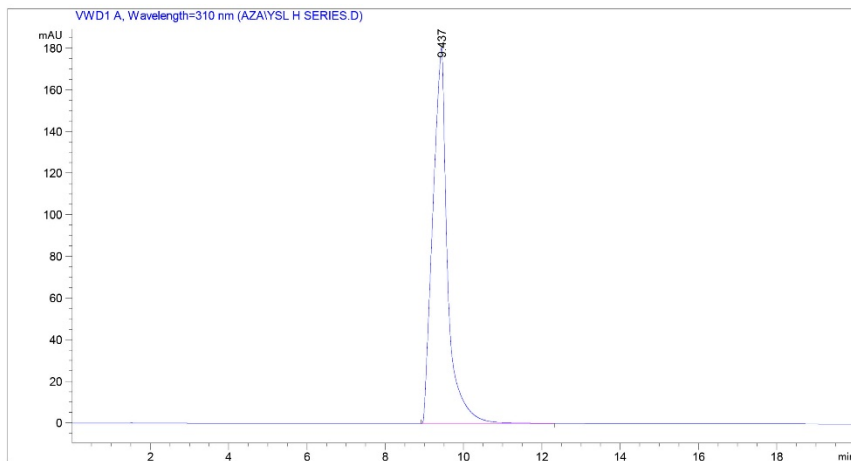

The original spectrums (NMR, MS, HPLC) of **B4**

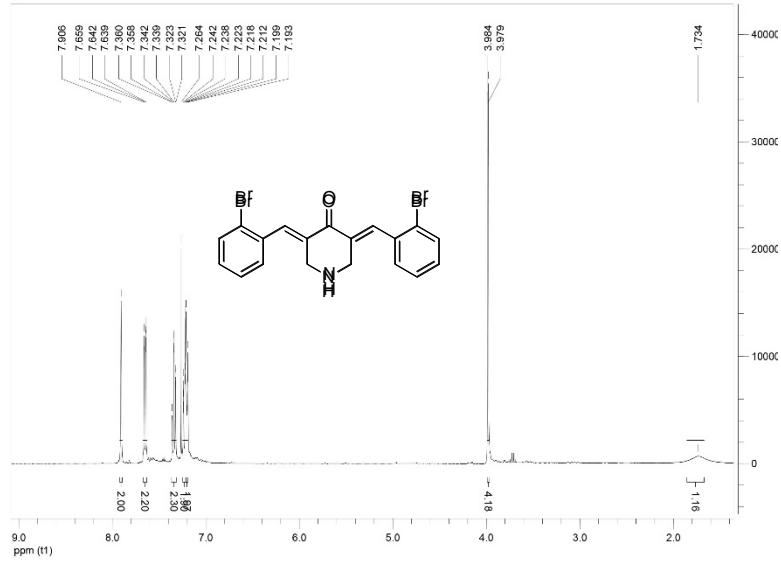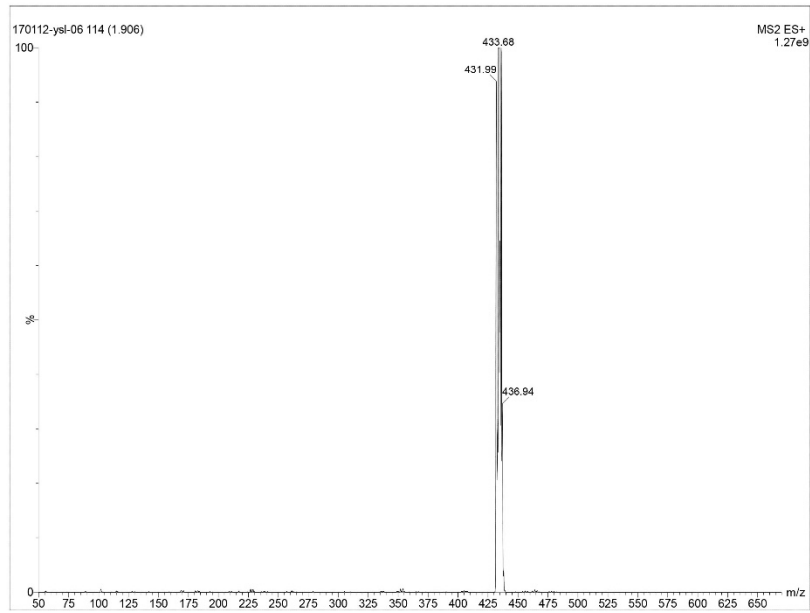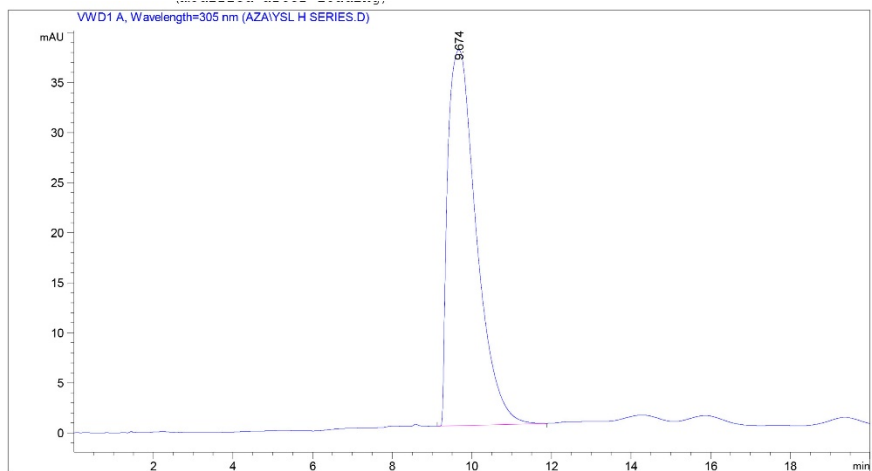

The original spectrums (NMR, MS, HPLC) of **B5**

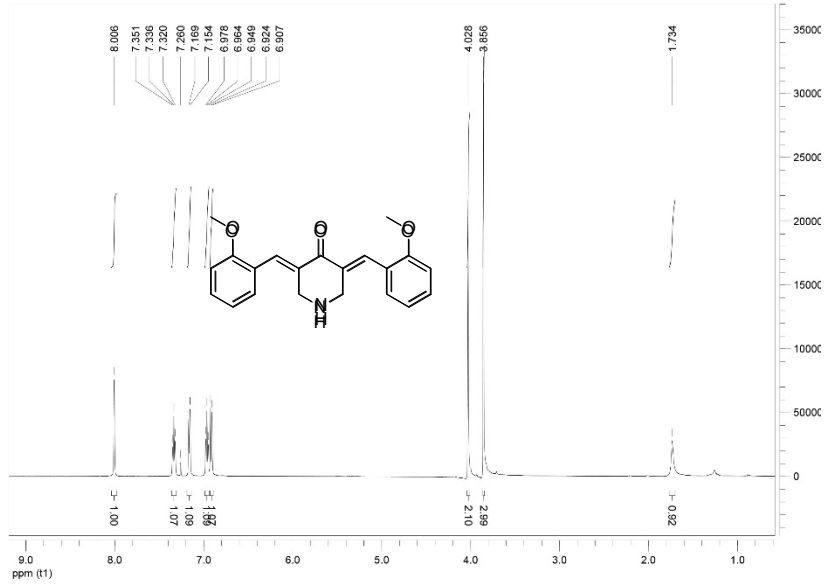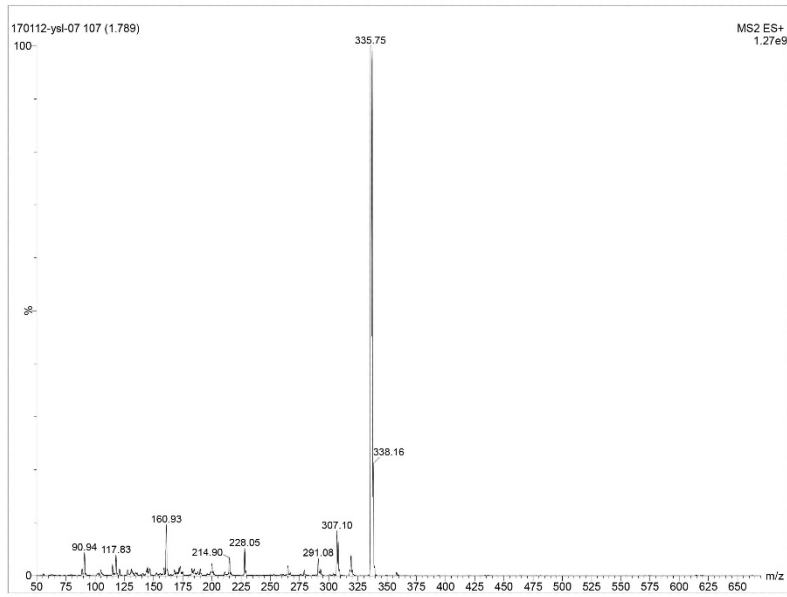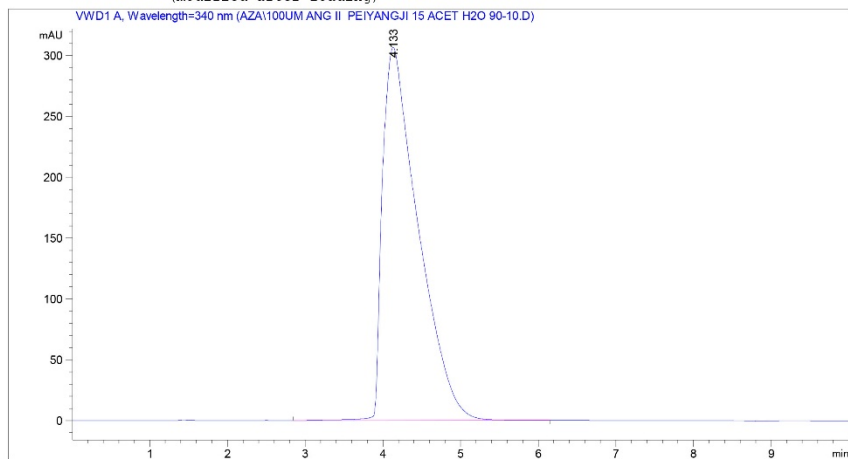

The original spectrums (NMR, MS, HPLC) of **C2**

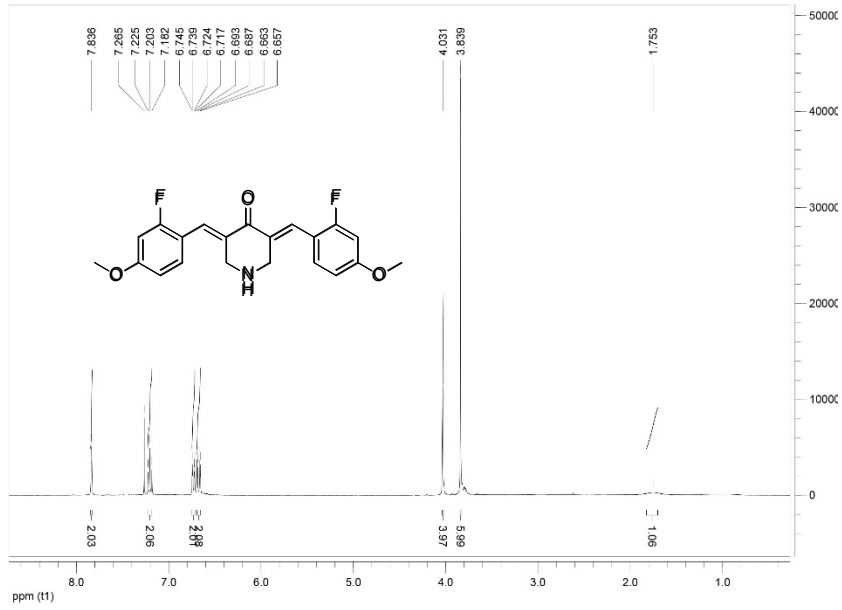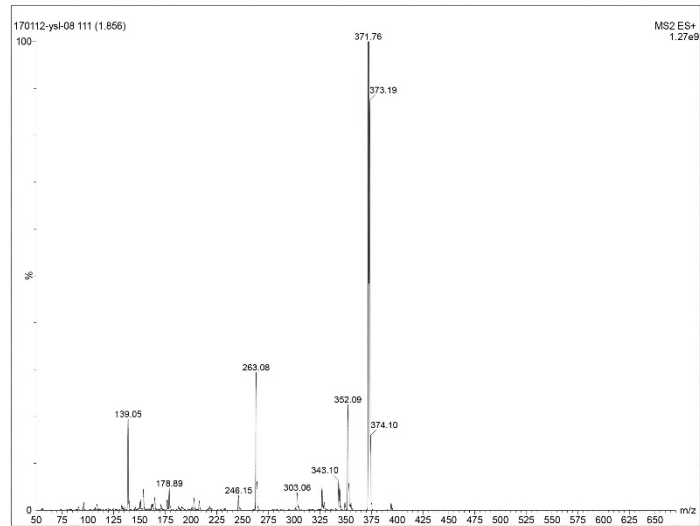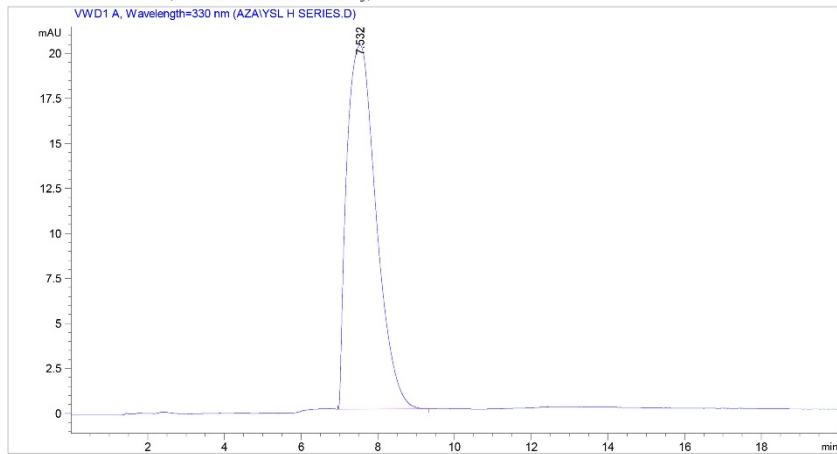

# The original spectrums (NMR, MS, HPLC) of C4

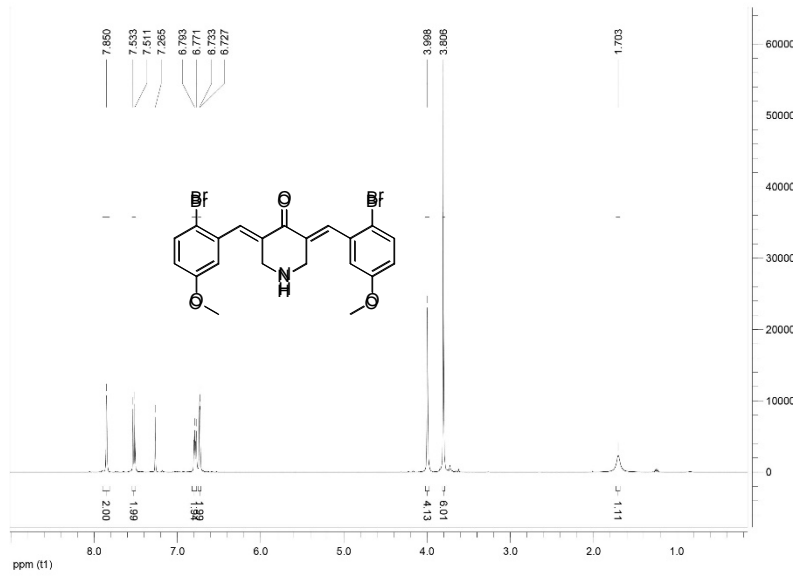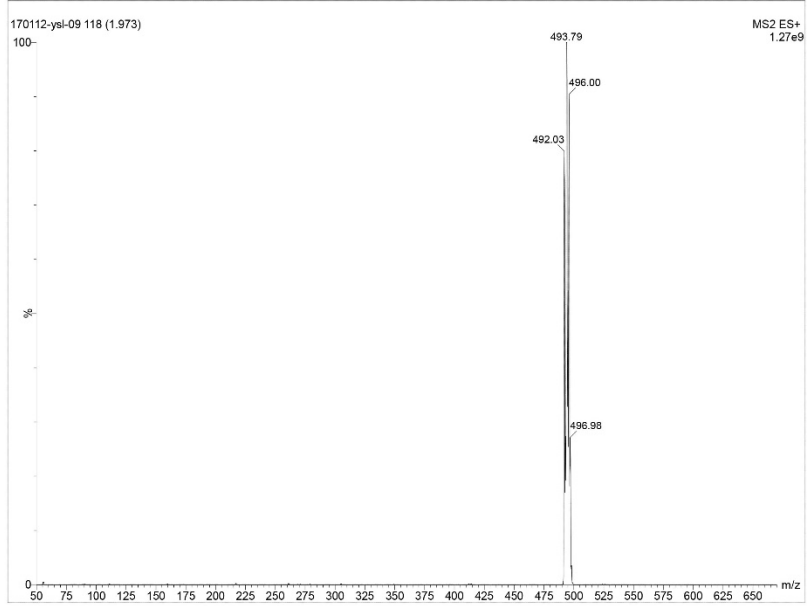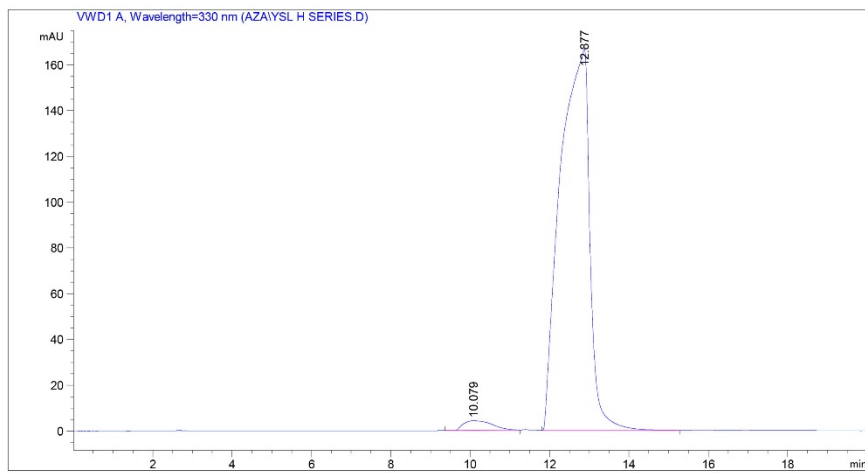



The original spectrums (NMR, MS, HPLC) of **C5**

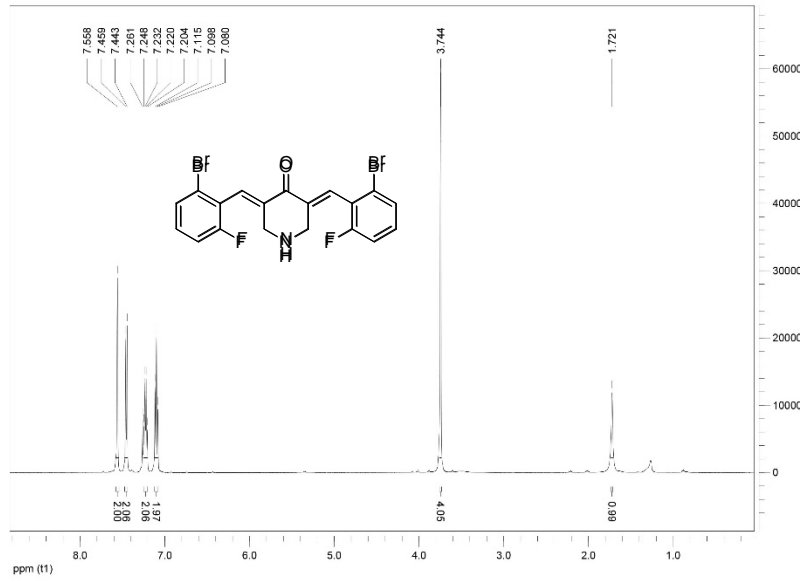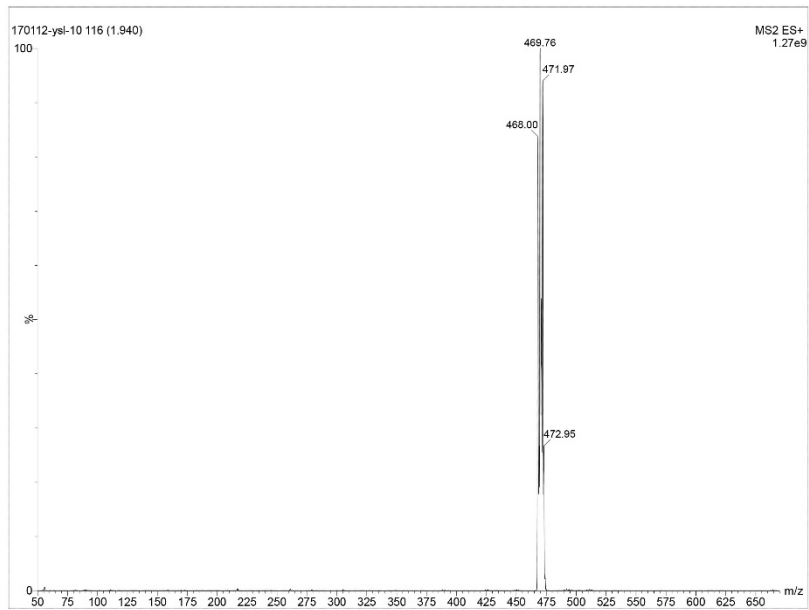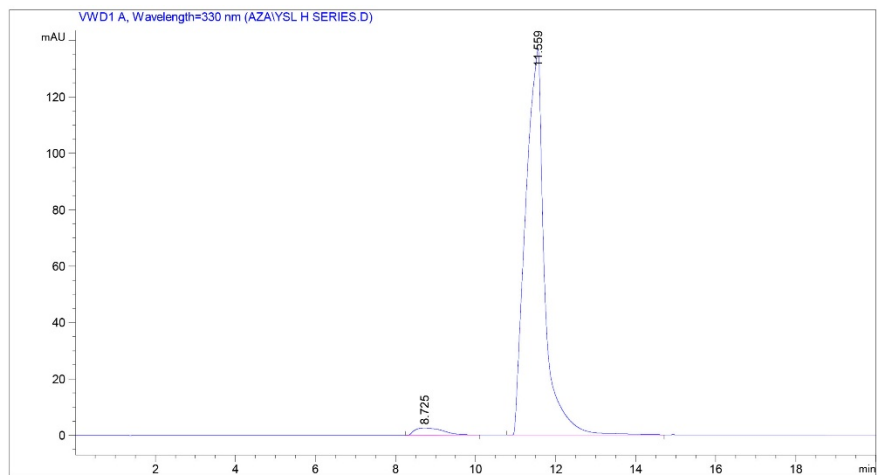



# The original spectrums (NMR, MS, HPLC) of C8

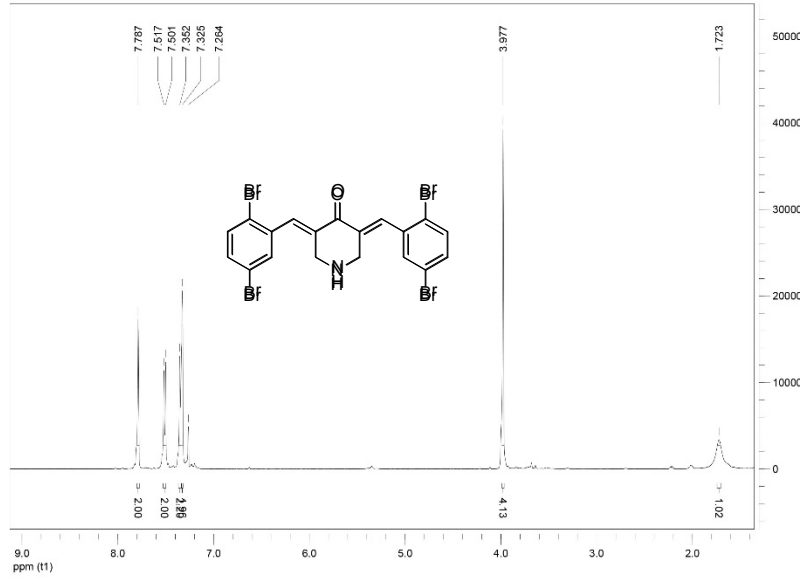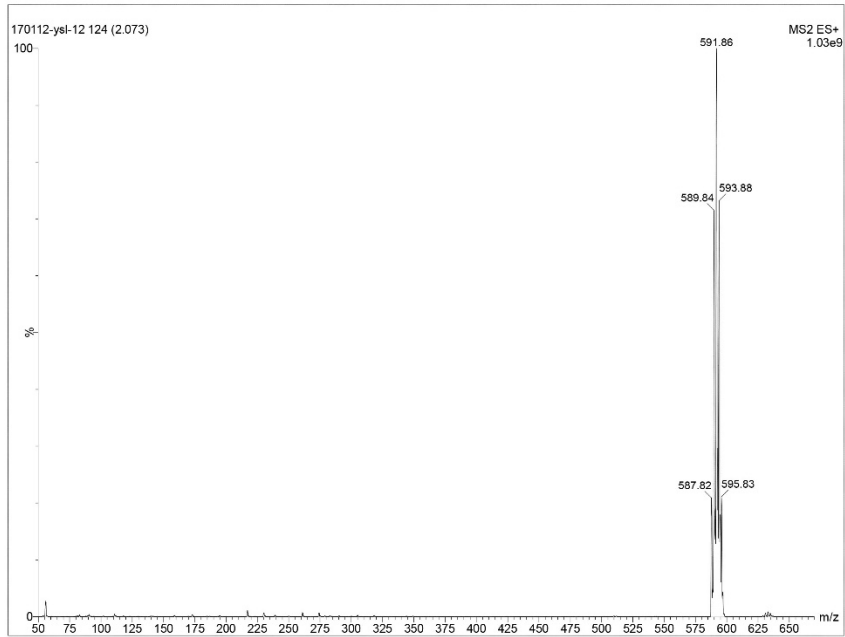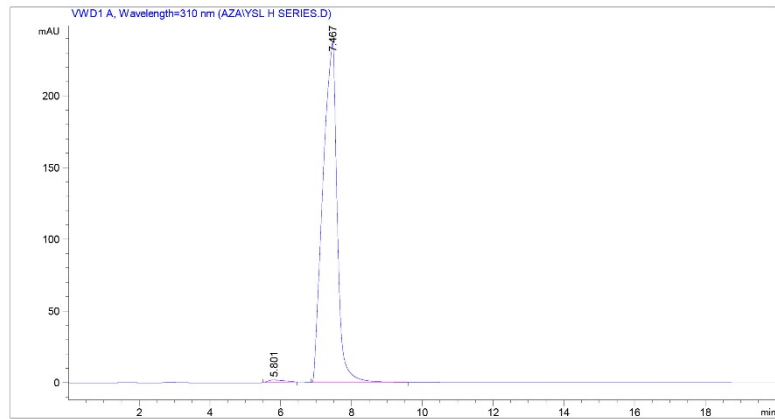

The original spectrums (NMR, MS, HPLC) of **C9**

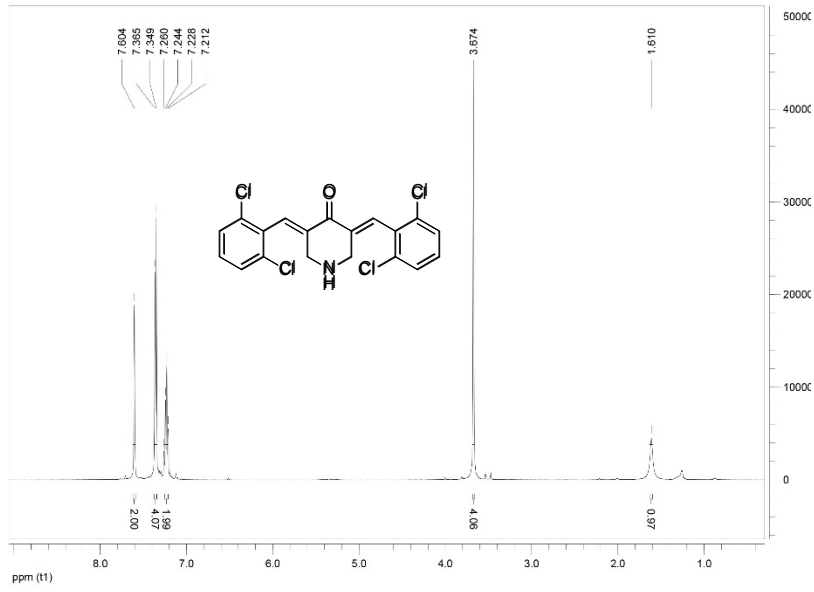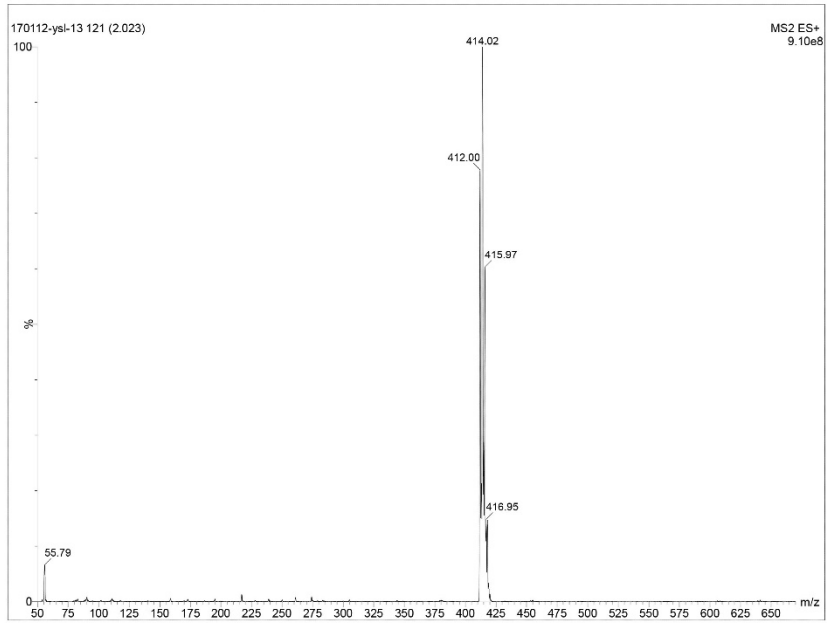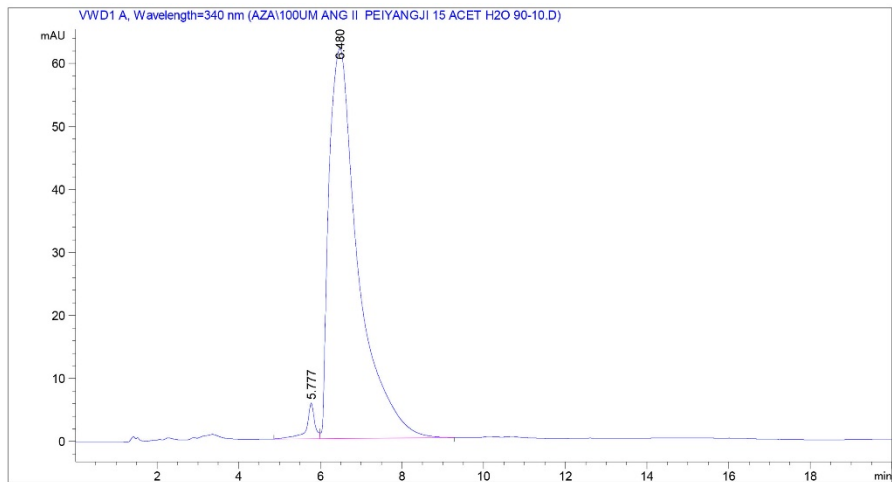

The original spectrums (NMR, MS, HPLC) of **D5**

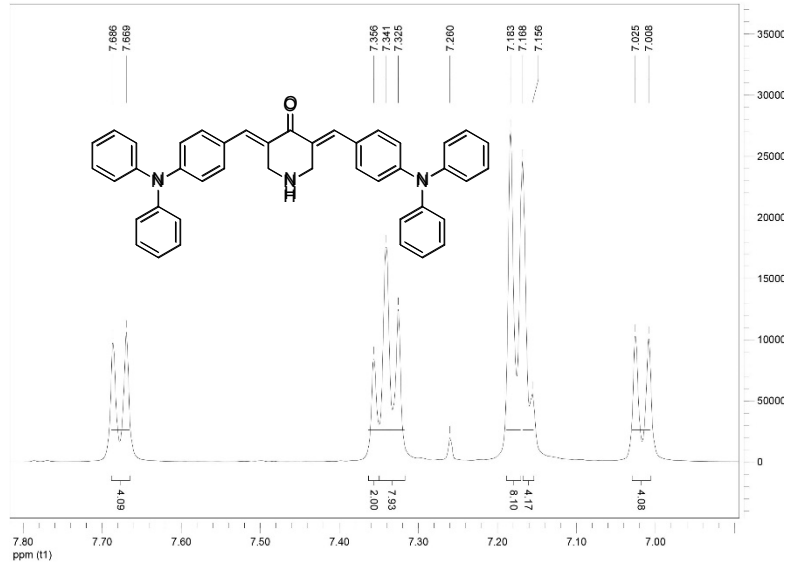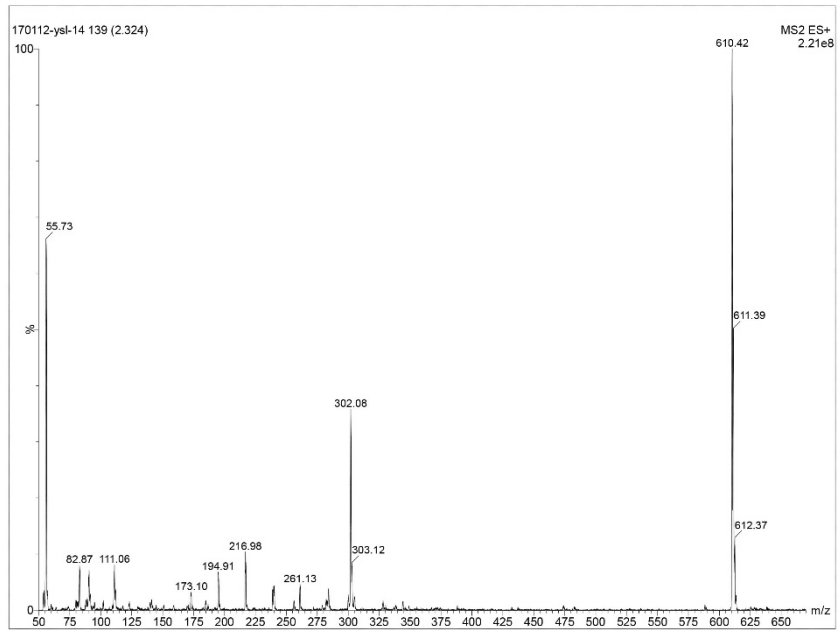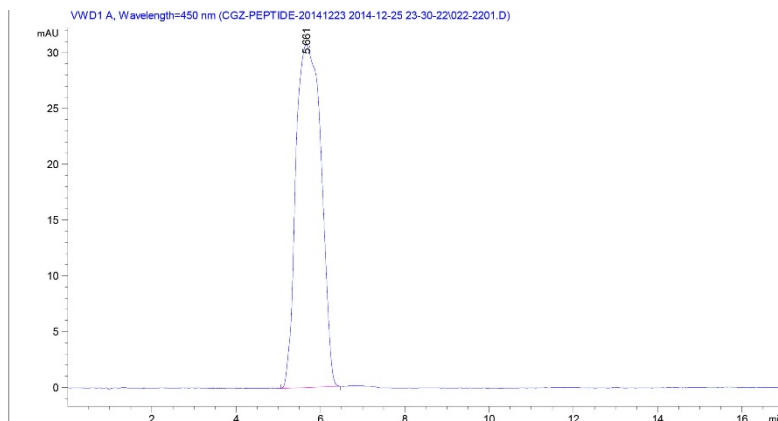

**Part 2:** Other than **D6**, the binding affinity between others active compounds, **B1**, **B2**, **B4** ( $IC_{50}$  less than  $10 \mu\text{M}$  in kinase assay), and  $IKK\beta$  was measured by SPR. The results was as shown below.

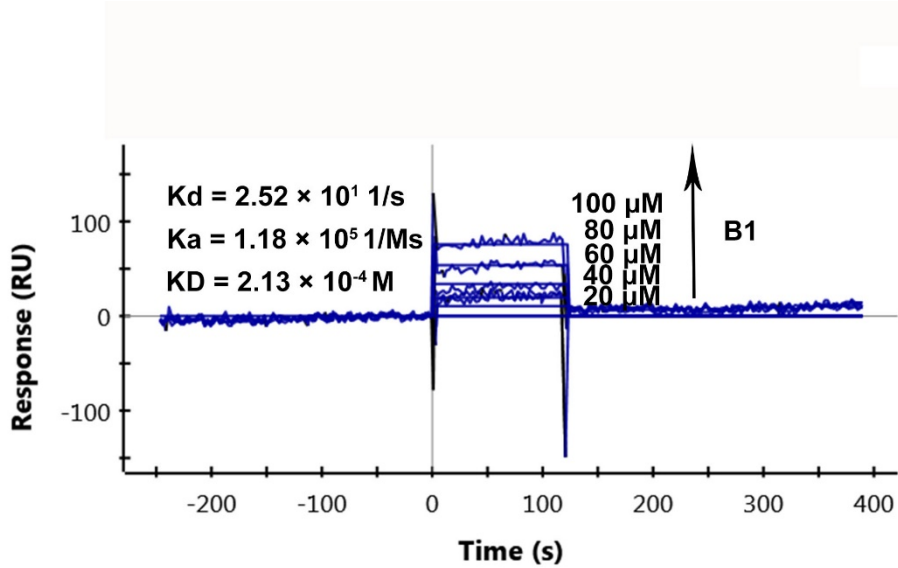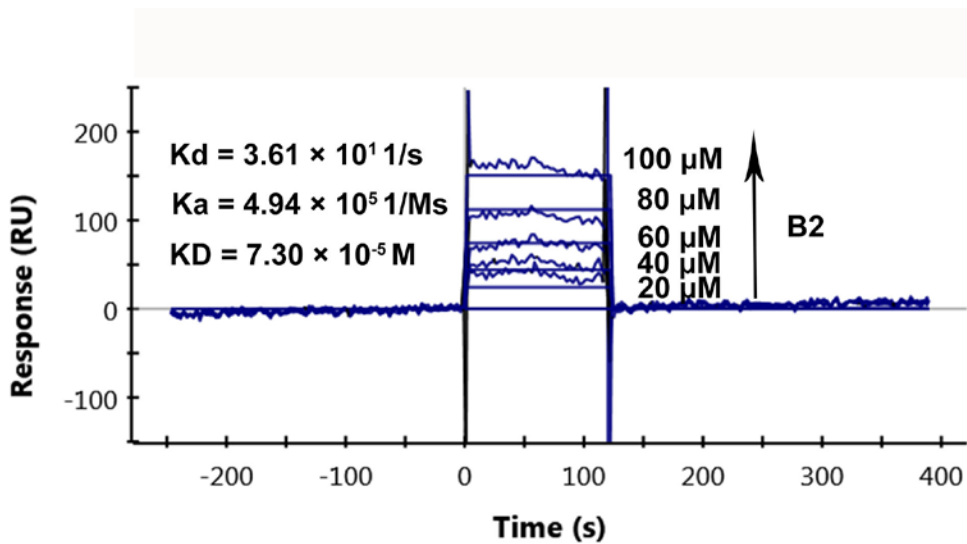

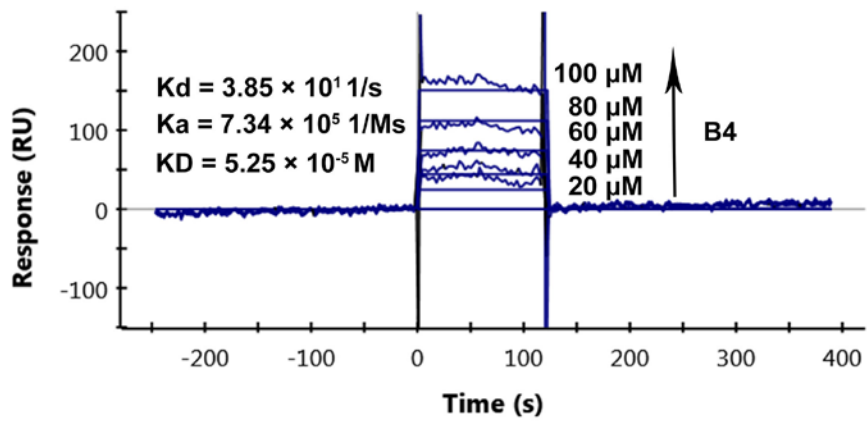

Supplement: Supplementary file 1 [file get_supplementary_file.php]
